# Supplementary material
Source: PubMed Central journal article supplement (PMC1751310)
Supplement: mbc_E06-08-0666_1.pdf [file mbc_E06-08-0666_1.pdf]

## **Supplemental Data**

**Supplementary Figure 1.** Proteins identified in the screen localising to neurite tips after NGF stimulation. PC12 cells were transfected with respective GFP-ORFs and incubated for 12 hours at 37°C. Thereafter cells were stimulated with NGF for 24 hours, fixed and stained with ConA-Alexa647 to highlight the outline of the cells. Each panel consists of two images – the left one shows the localisation of the GFP-tagged protein and the right one shows the merge between ConA-Alexa647 depicted in red and GFP-ORF in green. In the case of Sorbin and ?-BAR, a DIC image is shown instead of the merged fluorescence image. Above each panel the protein name and SwissPROT ID are shown. Arrows point to the protein accumulation in the neurite tip. Scale bar = 10µm.

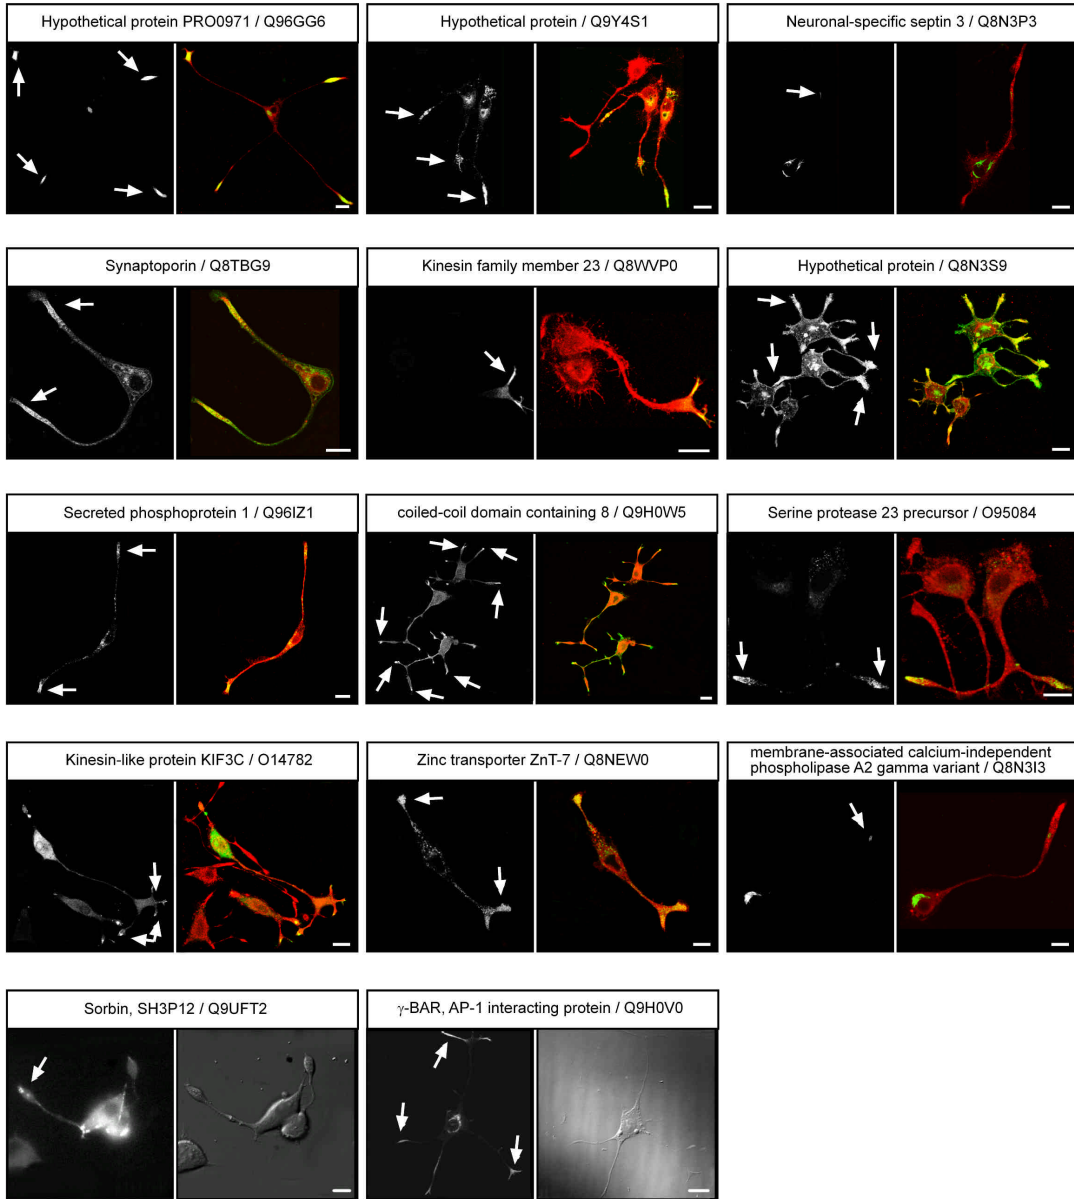

**Supplementary Figure 2.** Statistical analysis of proteins affecting neurite outgrowth when over-expressed in PC12 cells. Cells were assayed for neurite outgrowth as described in Materials and Methods. For every protein tested the average neurite length and average number of neurites per cell were calculated for both transfected cells and surrounding non-transfected cells. The left column shows statistical analysis of GFP (A) and control proteins (C,E) known to have an effect on neurite outgrowth upon over-expression, the right column (B, D, F) shows statistical analysis of identified candidate proteins which have similar effects to their corresponding controls. Each panel consists of four graphs; the upper two graphs show the distribution of neurite length in non-transfected and transfected cells with average length  $\pm$  S.D. indicated in the corner, while the two lower graphs show the distribution of neurite number per cell in non-transfected and transfected cells with average number of neurites per cell  $\pm$  S.D. indicated in the corner. A minimum of 60 cells were counted. Statistical significance was tested with the student's t-test,  $p < 0.0001$ . Statistical analysis of other proteins tested in the screen can be found on the web site <http://neurite.embl.de>.

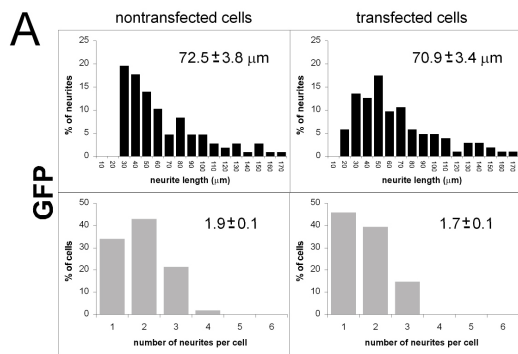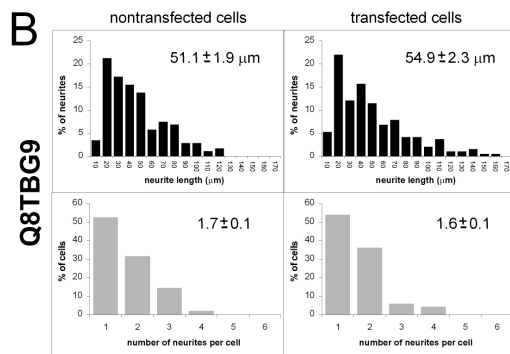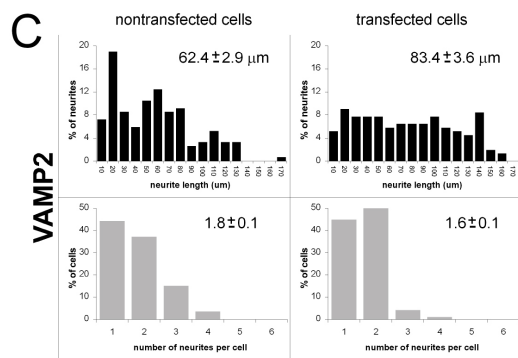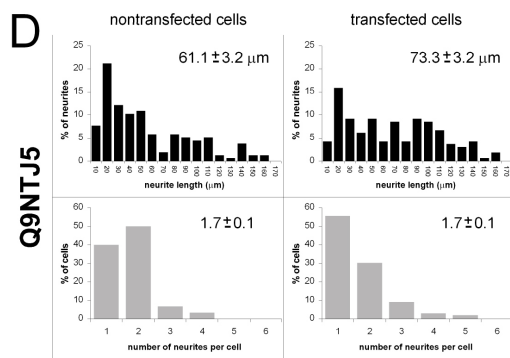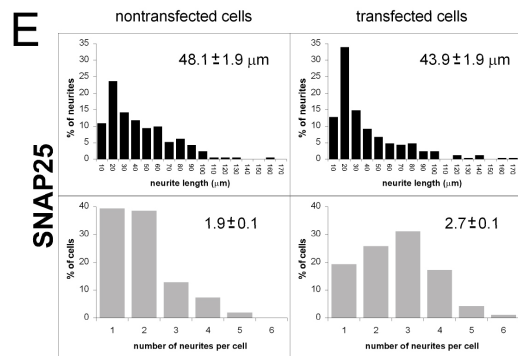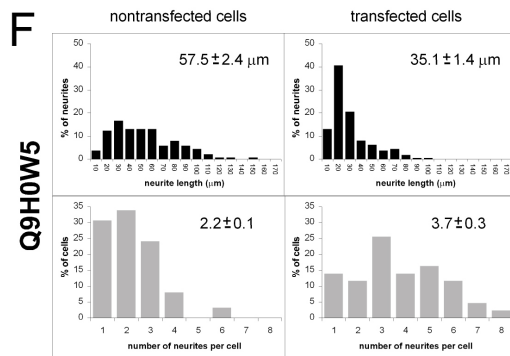

**Supplementary Figure 3.** Proteins that affected neurite outgrowth when over-expressed. PC12 cells were transfected with respective GFP-ORFs and incubated for 12 hours at 37°C. Thereafter cells were stimulated with NGF for 24 hours, fixed and stained with ConA-Alexa647 to highlight the outline of the cells. Each panel consists of an image showing an over-expression phenotype of the respective GFP-ORF (an image is the merge between ConA-Alexa647 depicted in red and GFP-ORF in green). At the side, protein name, SwissPROT ID and sub-cellular localisation are specified. Scale bars = 10µm. (A) – Proteins that affect the number of neurites per cell when over-expressed (SNAP25 phenotype) (B) – Proteins that affect the number of neurites per cell when over-expressed (Cdc42 phenotype) (C) – Proteins that affect the neurite length when over-expressed (VAMP2 phenotype) (D) – Proteins that block neurite outgrowth when over-expressed (RhoA phenotype).

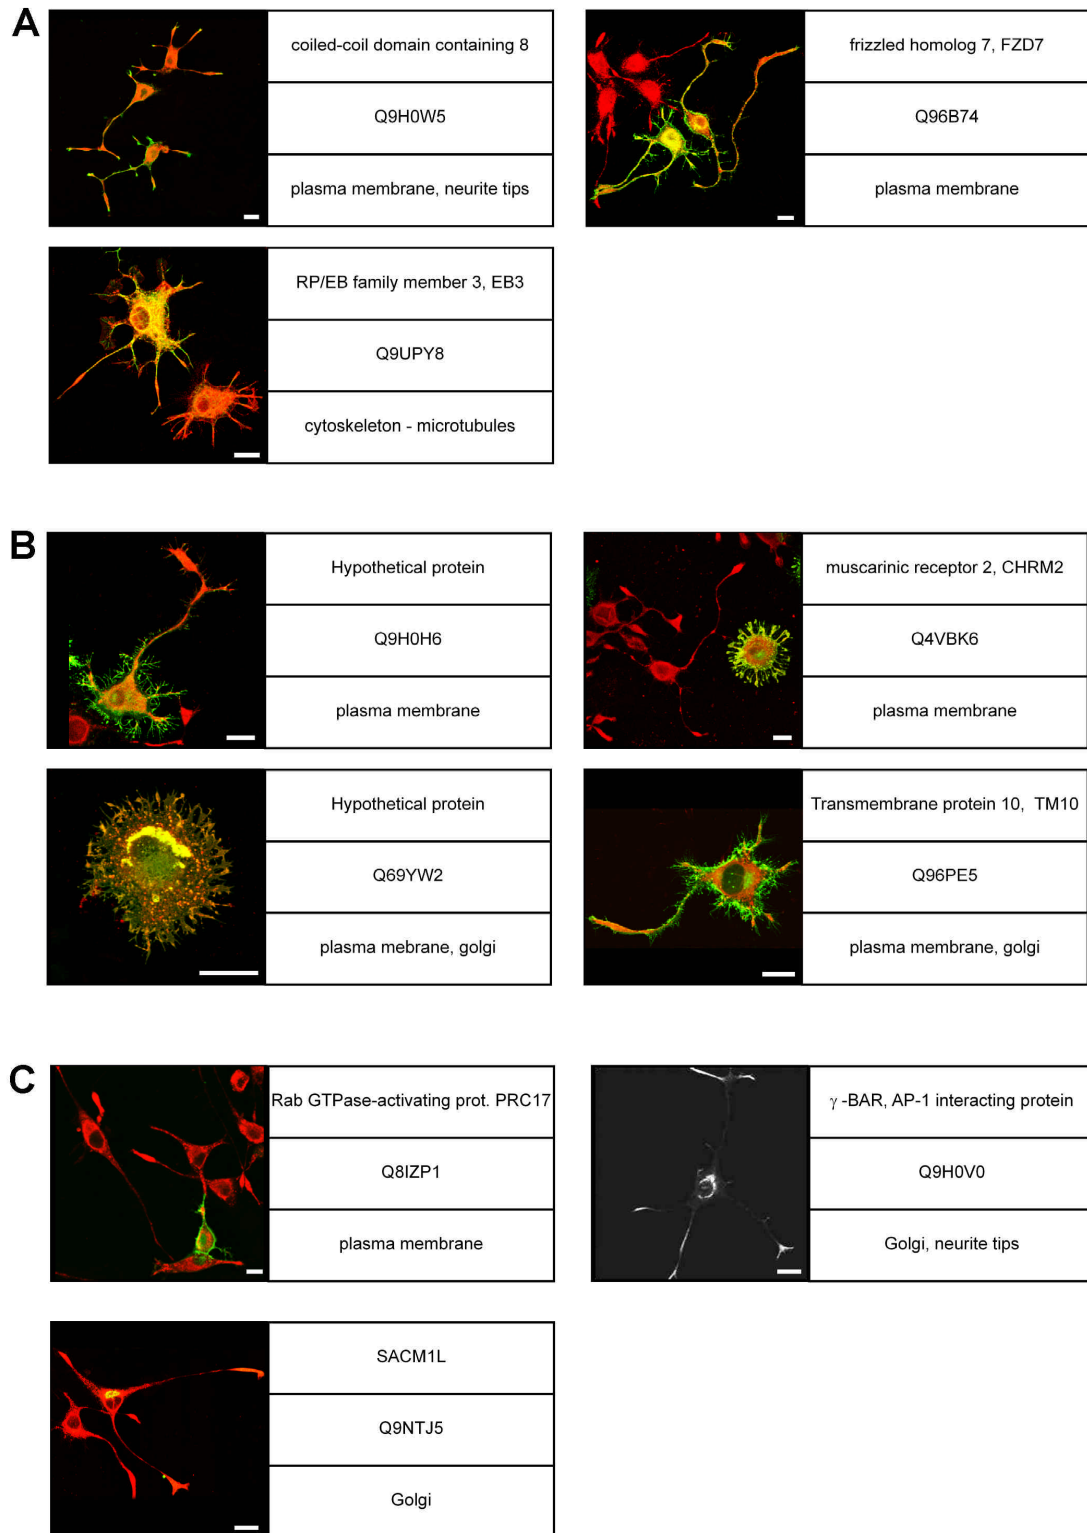

D

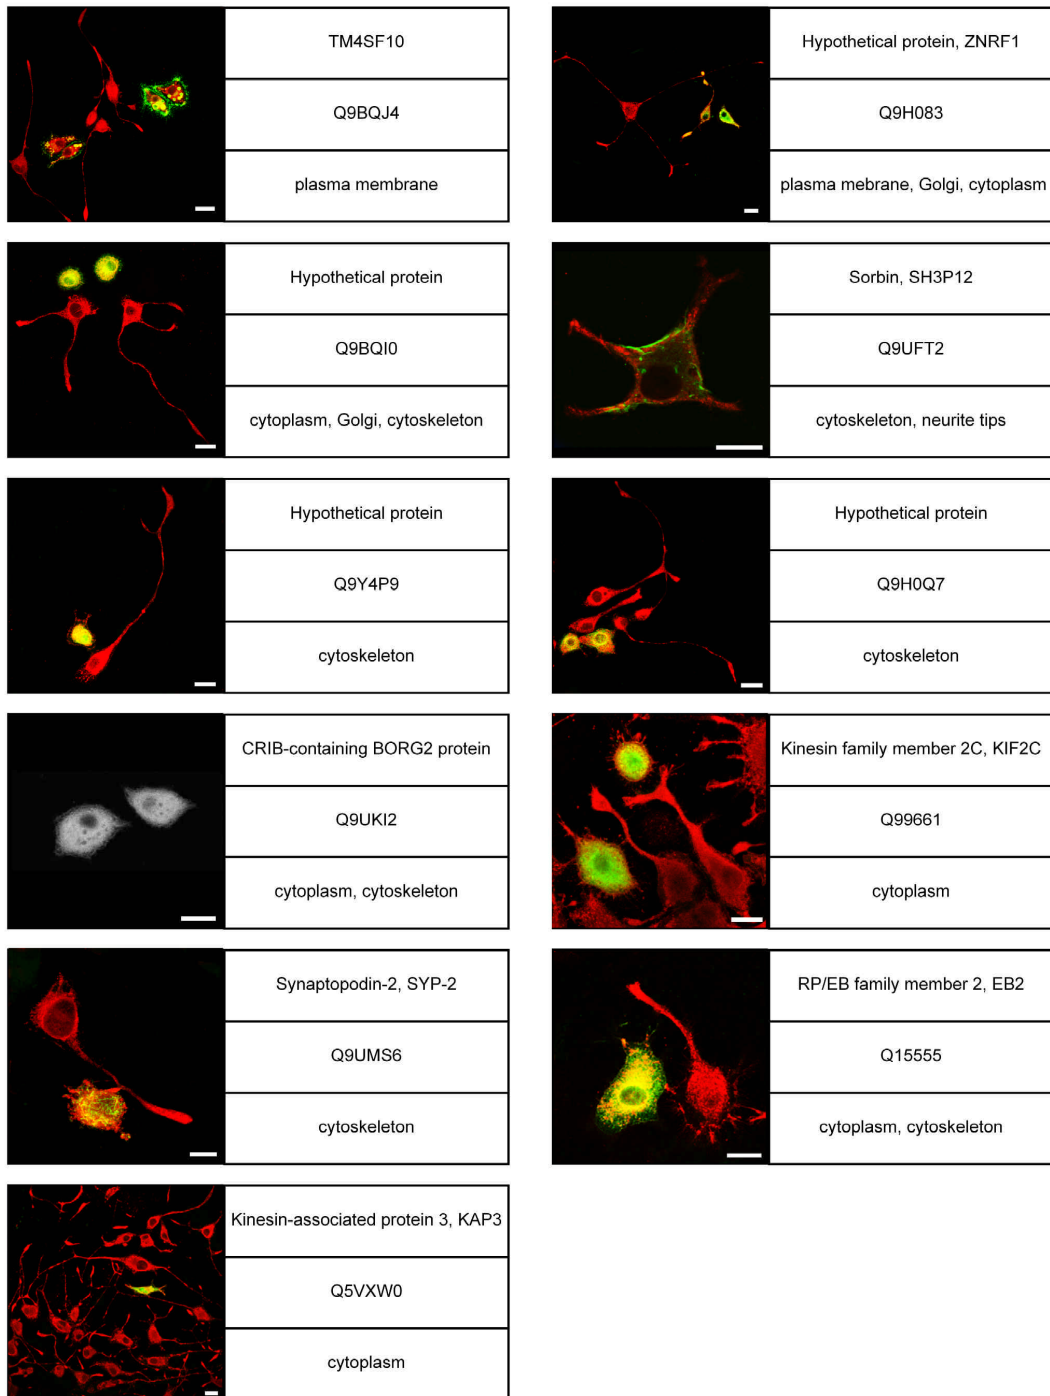

**Supplementary figure 4.** Changes in gene expression 24 hours after NGF treatment measured by real-time quantitative RT-PCR. Relative gene expression levels of the identified proteins and controls were examined using real-time quantitative reverse-transcription PCR (real-time qRT-PCR). RNA was isolated from PC12 cells before and 24h after NGF stimulation and expression changes were determined as described in Materials and Methods. Bars are representing relative expression level changes after 24 hours of NGF stimulation  $\pm$  S.D.

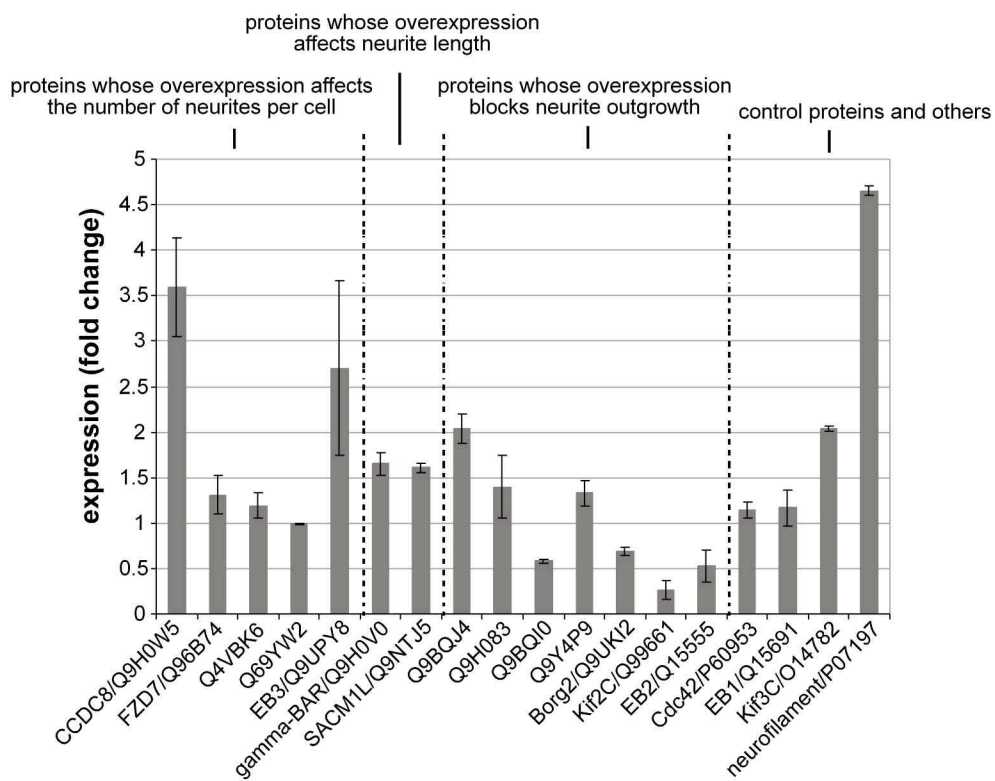



**Supplementary Figure 5.** Effect of Gsk3 $\beta$  inhibition on neurite number. Cells were stimulated with NGF (100 ng/ml) and with increasing concentrations of CHIR99021. Cells were left to differentiate for 24 hours. They were fixed and stained with ConA-Alexa647 to highlight the outline of the cells. (A) – PC12 cells after 24 hours of NGF stimulation (B) – PC12 cells after NGF stimulation in the presence of 8 $\mu$ M CHIR99021 stimulation. Scale bars = 10 $\mu$ m. (C) – Graphs show the changes in the percentages of cells with 1,2,3 and 4 or more neurites in response to increasing CHIR99021 concentrations. 20 images with 20x objective were taken and the number of neurites was scored on a minimum of 250 cells. Each experiment was repeated twice.

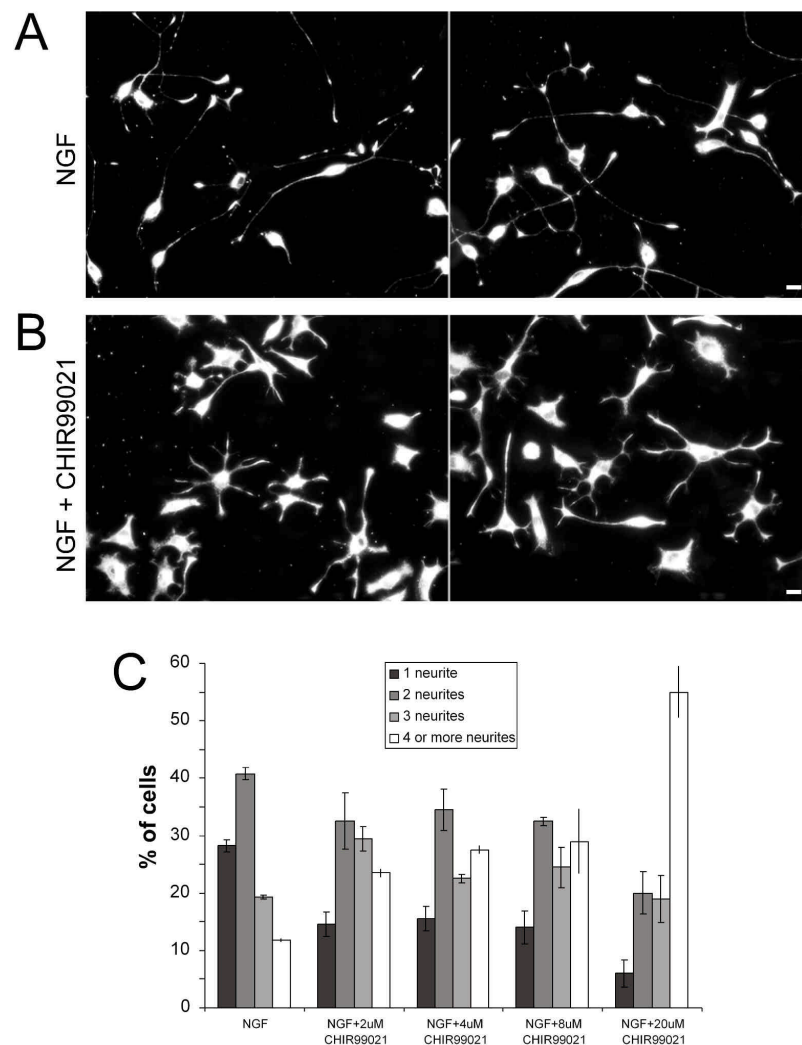

**Supplementary Video 1.** O14782 (Kif3C) dynamics during neurite outgrowth. PC12 cells were analysed by time-lapse microscopy as described in Materials and Methods. They were treated with NGF (100 ng/ml), mounted on the microscope and a transmission (DIC) and fluorescent image was acquired every three minutes for 8 hours. Note O14782 accumulation at the discrete points at the plasma membrane even before any degree of morphological differentiation is visible. Time is indicated in the upper left corner. Scale bar = 20  $\mu$ m.

**Supplementary Video 2.** Q8TBG9 (synaptoporin) dynamics during neurite outgrowth. PC12 cells were analysed by time-lapse microscopy as described in Materials and Methods. They were treated with NGF (100 ng/ml), mounted on the microscope and a transmission (DIC) and fluorescent image was acquired every three minutes for 10 hours. Note that Q8TBG9 accumulates at the neurite tip after the neurite formed. Time is indicated in the upper left corner. Scale bar = 20  $\mu$ m.

**Supplementary Video 3.** Q9UKI2 (Borg2) dynamics during neurite outgrowth. PC12 cells were analysed by time-lapse microscopy as described in Materials and Methods. They were treated with NGF (100 ng/ml), mounted on the microscope and a transmission (DIC) and fluorescent image was acquired every three minutes for 13 hours. Note the appearance of small patches of Borg2 accumulation on the plasma membrane. Time is indicated in the upper left corner. Scale bar = 20  $\mu$ m.

**Supplementary Video 4.** Q9BQI0 (hypothetical protein) dynamics during neurite outgrowth. PC12 cells were analysed by time-lapse microscopy as described in Materials and Methods. They were treated with NGF (100 ng/ml), mounted on the microscope and a transmission (DIC) and fluorescent image was acquired every three minutes for 11 hours. Time is indicated in the upper left corner. Scale bar = 20  $\mu$ m.

**Supplementary Table 1.** Localisation of selected proteins in Vero and PC12 cells.

Proteins are sorted according to their localisation in Vero cells.

Plasma membrane

| Protein Name                                         | Swissprot ID | Accession Number / clone ID | localisation in Vero cells             | localisation in PC12 cells                        |
|------------------------------------------------------|--------------|-----------------------------|----------------------------------------|---------------------------------------------------|
| Actin-like protein 6A                                | O96019       | AL136608 / DKFZp564J2222    | plasma membrane                        | plasma membrane                                   |
| Hypothetical protein                                 | Q9H097       | AL136887 / DKFZp434K1172    | plasma membrane                        | plasma membrane                                   |
| Hypothetical protein                                 | Q8N3J6       | AL834270 / DKFZp761G128     | plasma membrane                        | plasma membrane                                   |
| Synaptotagmin-3, SYT3 (control)                      | Q9BQG1       | AL136594 / DKFZp761O132     | plasma membrane + endosomes, lysosomes | vesicles                                          |
| MARCKS-like 1                                        | P49006       | AL713653 / DKFZp547C2413    | plasma membrane                        | unknown                                           |
| Junctional adhesion molecule 1, JAM1                 | Q9Y624       | AL136649 / DKFZp564H1562    | plasma membrane + junctional adhesions | plasma membrane                                   |
| htes3_73k11                                          |              | DKFZp434K1173               | plasma membrane + mitochondria         | no NGF - nucleus + cytoplasm, with NGF - vesicles |
| Hypothetical protein                                 | Q8N3L4       | AL834247 / DKFZp451E012     | plasma membrane + cytoplasm            | vesicles + cytoplasm                              |
| Hypothetical protein                                 | Q8N3S9       | AL831962 / DKFZp451D112     | plasma membrane + actin                | plasma membrane + golgi + neurite tips            |
| coiled-coil domain containing 8, CCDC8               | Q9H0W5       | AL136609 / DKFZp564K0322    | plasma membrane                        | plasma membrane + neurite tips                    |
| Hypothetical protein                                 | Q9H0H6       | AL136793 / DKFZp434A171     | plasma membrane                        | plasma membrane                                   |
| frizzled homolog 7, FZD7                             | Q96B74       | BC015915 / IMAGE:4549389    | plasma membrane + ER                   | plasma membrane + Golgi                           |
| cholinergic receptor, muscarinic 2, CHRM2, isoform a | Q4VBK6       | AL832585 / DKFZp451H2216    | plasma membrane + ER + Golgi           | plasma membrane                                   |

|                                                                           |        |                              |                                    |                                   |
|---------------------------------------------------------------------------|--------|------------------------------|------------------------------------|-----------------------------------|
| Hypothetical protein                                                      | Q69YW2 | AL137507 /<br>DKFZp761P211   | plasma<br>membrane + ER<br>+ Golgi | plasma<br>membrane +<br>Golgi     |
| TBC1 domain family<br>member 3, Rab GTPase-<br>activating protein         | Q8IZP1 | AL136860 /<br>DKFZp434P2235  | plasma<br>membrane                 | plasma<br>membrane                |
| Transmembrane 4<br>superfamily member 10,<br>TM4SF10                      | Q9BQJ4 | AL136550 /<br>DKFZp761J17121 | plasma<br>membrane                 | plasma<br>membrane +<br>vesicles  |
| Annexin A4 (control)                                                      | P09525 |                              | not tested                         | plasma<br>membrane +<br>cytoplasm |
| Calcium/calmodulin-<br>dependent protein kinase<br>type II beta (control) | Q13554 |                              | not tested                         | plasma<br>membrane +<br>cytoplasm |

### Plasma membrane and Golgi

| Protein Name                                                                        | Swissprot<br>ID | Accession Number<br>/ clone ID | localisation in<br>Vero cells                           | localisation in<br>PC12 cells            |
|-------------------------------------------------------------------------------------|-----------------|--------------------------------|---------------------------------------------------------|------------------------------------------|
| Guanine nucleotide<br>binding protein, alpha<br>inhibiting activity<br>polypeptide1 | Q9UGA4          | AL049933 /<br>DKFZp564K1216    | plasma membrane<br>+ Golgi                              | plasma<br>membrane +<br>Golgi            |
| Integral membrane protein<br>2C, Transmembrane<br>protein BRI3                      | Q9NQX7          | AL136603 /<br>DKFZp564L1216    | plasma membrane<br>+ Golgi + ER                         | Golgi                                    |
| Hypothetical protein                                                                | Q9BQG9          | AL136580 /<br>DKFZp761H2024    | plasma membrane<br>+ Golgi                              | plasma<br>membrane +<br>Golgi            |
| GPR85, Super conserved<br>receptor expressed in brain<br>2                          | Q9NPD1          | AL161959 /<br>DKFZp761L08121   | plasma membrane<br>+ Golgi + ER                         | plasma<br>membrane +<br>Golgi + vesicles |
| Protein kinase STYK1                                                                | Q9NSH1          | AL353940 /<br>DKFZp761P1010    | plasma membrane<br>+ Golgi                              | plasma<br>membrane +<br>Golgi + vesicles |
| prominin 1                                                                          | Q96EN6          | BC012089 /<br>IMAGE:4644690    | plasma membrane<br>+ Golgi                              | plasma<br>membrane +<br>Golgi + vesicles |
| Complement component<br>C1q receptor, CD93<br>antigen                               | Q9NPY3          | BC028075 /<br>IMAGE:5216061    | plasma membrane<br>+ Golgi + ER                         | plasma<br>membrane +<br>Golgi            |
| Protein C20orf98                                                                    | Q9GZP1          | AL136915 /<br>DKFZp586F1919    | plasma membrane<br>+ Golgi +<br>endosomes,<br>lysosomes | Golgi + vesicles                         |
| Sodium channel beta-3<br>subunit, CIB3                                              | Q9NY72          | AL136589 /<br>DKFZp761F182     | plasma membrane<br>+ Golgi + ER                         | Golgi                                    |

|                                                        |        |                          |                              |                                        |
|--------------------------------------------------------|--------|--------------------------|------------------------------|----------------------------------------|
| Hypothetical protein PRO0971, Gamma-BAR splice variant | Q96GG6 | BC009485 / IMAGE:3623656 | plasma membrane + Golgi      | Golgi + neurite tips                   |
| Synaptoporin (control)                                 | Q8TBG9 | AL834457 / DKFZp547J226  | plasma membrane + Golgi + ER | plasma membrane + Golgi + neurite tips |
| Transmembrane protein 10, TM10                         | Q96PE5 | AL834229 / DKFZp761K0421 | plasma membrane + Golgi      | plasma membrane + Golgi                |
| Gamma-BAR, AP-1 interacting protein                    | Q9H0V0 | AL136628 / DKFZp564C182  | plasma membrane + Golgi      | Golgi + neurite tips                   |
| Hypothetical protein, zinc and ring finger 1, ZNRF1    | Q9H083 | AL136903 / DKFZp434E229  | plasma membrane + Golgi      | plasma membrane + Golgi                |
| Synaptosomal-associated protein 25 (SNAP-25) (control) | P60880 |                          | not tested                   | plasma membrane + Golgi                |

## Golgi

| Protein Name                                         | Swissprot ID | Accession Number / clone ID | localisation in Vero cells | localisation in PC12 cells |
|------------------------------------------------------|--------------|-----------------------------|----------------------------|----------------------------|
| Hypothetical protein                                 | Q9BQG3       | AL136588 / DKFZp761D112     | Golgi + ER                 | Golgi                      |
| Hypothetical protein                                 | Q9H0W4       | AL136610 / DKFZp564K0822    | Golgi + ER                 | cytoplasm                  |
| Hypothetical protein                                 | Q9UFC6       | AL133049 / DKFZp434E1315    | Golgi                      | Golgi                      |
| Hypothetical protein                                 | Q9H076       | AL136916 / DKFZp586G1919    | Golgi                      | Golgi + vesicles           |
| NDRG2 protein                                        | Q9UN36       | AL136574 / DKFZp761J1923    | Golgi                      | cytoplasm                  |
| NDRG4 protein (Brain development-related molecule 1) | Q9ULP0       | AL136584 / DKFZp761P2324    | Golgi                      | cytoplasm                  |
| Hypothetical protein                                 | Q9H0B8       | AL136861 / DKFZp434B044     | Golgi + ER                 | cytoplasm                  |
| Secretory carrier-associated membrane protein 5      | Q8N3M4       | AL834226 / DKFZp761D1321    | Golgi + ER                 | Golgi + vesicles           |
| Hypothetical protein                                 | Q9H0V1       | AL136626 / DKFZp564C012     | Golgi + ER                 | Golgi + vesicles           |

|                                                                      |        |                              |                                         |                         |
|----------------------------------------------------------------------|--------|------------------------------|-----------------------------------------|-------------------------|
| Hypothetical protein                                                 | Q8N3G9 | AL834349 /<br>DKFZp761H2017  | Golgi + ER +<br>endosomes,<br>lysosomes | vesicles                |
| Synaptotagmin 13                                                     | Q9P2C0 | AL512743 /<br>DKFZp547F213   | Golgi                                   | Golgi +<br>vesicles     |
| ITBA1 protein (CXorf12<br>protein)                                   | Q14656 | BC008203 /<br>IMAGE:3868838  | Golgi + ER                              | Golgi +<br>vesicles     |
| Hypothetical protein                                                 | Q6UWH4 | AL832589 /<br>DKFZp451L1216  | Golgi                                   | Golgi                   |
| Proprotein convertase<br>subtilisin/kexin type 5,<br>preproprotein   | Q96EP4 | AL834522 /<br>DKFZp667I0310  | Golgi + ER                              | Golgi                   |
| Deoxyribonuclease gamma<br>precursor, Deoxyribonuclease I-<br>like 3 | Q13609 | BC015831 /<br>IMAGE:4723725  | Golgi                                   | Golgi                   |
| Surfeit 4                                                            | O15260 | BX647961 /<br>DKFZp686P1751  | Golgi                                   | Golgi +<br>vesicles     |
| Ras-related protein Rab-6C<br>(control)                              | Q9H0N0 | AL136727 /<br>DKFZp566K144   | Golgi                                   | Golgi                   |
| Ras-related protein Rab-33B<br>(control)                             | Q9H082 | AL136904 /<br>DKFZp434G099   | Golgi                                   | Golgi                   |
| Coatmer beta subunit (control)                                       | P53618 | AL136593 /<br>DKFZp761K102   | Golgi                                   | Golgi                   |
| Ras-related protein Rab-1B<br>(control)                              | Q9H0U4 | AL136635 /<br>DKFZp564I172   | Golgi                                   | Golgi                   |
| Coatmer epsilon subunit                                              | O14579 | AL136928 /<br>DKFZp586A1622  | Golgi                                   | Golgi                   |
| Biglycan                                                             | P21810 | BC002416 /<br>IMAGE:3162633  | Golgi + ER                              | Golgi                   |
| Vesicle docking protein p115,<br>VDP                                 | Q86TB8 | AL832010 /<br>DKFZp451D234   | Golgi                                   | Golgi                   |
| ADP-ribosylation factor-like<br>protein 1, ARL1                      | P40616 | BX537387 /<br>DKFZp686O2082  | Golgi                                   | Golgi                   |
| KIAA1040 Hypothetical protein                                        | Q7Z3U7 | BX537415 /<br>DKFZp686F0546  | Golgi                                   | Golgi                   |
| Zinc transporter ZnT-7, Solute<br>carrier family 30                  | Q8NEW0 | BX537375 /<br>DKFZp686D18111 | Golgi +<br>endosomes,<br>lysosomes      | Golgi + neurite<br>tips |
| Serine protease 23 precursor                                         | O95084 | AL136914 /<br>DKFZp586B0719  | Golgi                                   | neurite tips            |
| Hypothetical protein                                                 | Q9Y4S1 | AL080121                     | Golgi +<br>endosomes                    | Golgi + neurite<br>tips |

|                                                                                            |        |                          |            |                      |
|--------------------------------------------------------------------------------------------|--------|--------------------------|------------|----------------------|
| Secreted phosphoprotein 1, SPP-1                                                           | Q96IZ1 | BC007016 / IMAGE:4052438 | Golgi      | Golgi + neurite tips |
| SACM1L                                                                                     | Q9NTJ5 | AL136831 / DKFZp434O1328 | Golgi + ER | Golgi                |
| GTP-binding protein SAR1 (COPII-associated small GTPase) (control)                         | Q9NR31 |                          | not tested | Golgi + cytoplasm    |
| Vesicle-associated membrane protein 2 (Synaptobrevin 2), VAMP2 (control)                   | Q9BUC2 |                          | not tested | Golgi + neurite tips |
| GTP restricted dominant negative mutant of Sar1p GTPase (Sar1p <sup>H79G</sup> ) (control) |        |                          | not tested | Golgi                |

### Cytoskeleton

| Protein Name                                                                         | Swissprot ID | Accession Number / clone ID | localisation in Vero cells     | localisation in PC12 cells              |
|--------------------------------------------------------------------------------------|--------------|-----------------------------|--------------------------------|-----------------------------------------|
| Hypothetical protein                                                                 | Q9H0T6       | AL136646 / DKFZp564B1162    | cytoskeleton - focal adhesions | plasma membrane                         |
| Epithelial protein lost in neoplasm, EPLIN                                           | Q9UHB6       | AL136911 / DKFZp586I1918    | cytoskeleton - actin           | cytoskeleton - actin                    |
| Hypothetical protein, DNA polymerase-transactivated protein 6                        | Q9NTW4       | AL110124 / DKFZp564A2416    | cytoskeleton - microtubules    | cytoskeleton - microtubules             |
| Hypothetical protein                                                                 | Q9H0M7       | AL136730 / DKFZp434H2010    | cytoskeleton - focal adhesions | plasma membrane                         |
| Gamma-1-syntrophin, G1SYN, Syntrophin 4                                              | Q9NSN8       | AL161971 / DKFZp761I2312    | cytoskeleton - filaments       | cytoskeleton + cytoplasm + nucleus      |
| Hypothetical protein                                                                 |              | BI828924 / IMAGE:5166884    | cytoskeleton - microtubules    | cytoskeleton - microtubules             |
| Rho/rac guanine nucleotide exchange factor (GEF) 2                                   | Q9H023       | AL512715 / DKFZp547L106     | cytoskeleton - microtubules    | cytoskeleton - microtubules + cytoplasm |
| Neuronal-specific septin 3                                                           | Q8N3P3       | AL833942 / DKFZp761P16121   | cytoskeleton                   | unknown + neurite tips                  |
| intracellular membrane-associated calcium-independent phospholipase A2 gamma variant | Q8N3I3       | AL834147 / DKFZp761P18121   | cytoskeleton                   | unknown + neurite tips                  |

|                                                                               |        |                          |                                          |                                            |
|-------------------------------------------------------------------------------|--------|--------------------------|------------------------------------------|--------------------------------------------|
| Kinesin-like protein KIF3C                                                    | O14782 |                          | not tested                               | cytoplasm + neurite tips                   |
| Microtubule-associated protein tau                                            | P10636 | BC000558 / IMAGE:3162763 | cytoskeleton - microtubules              | cytoskeleton - microtubules                |
| Kinesin family member 23, KIF23                                               | Q8WVP0 | BC017705 / IMAGE:4420248 | cytoskeleton - microtubules              | cytoskeleton - microtubules + neurite tips |
| Angiomotin-like 1                                                             | Q8IY63 | BX648729 / DKFZp451H0710 | cytoskeleton                             | unknown                                    |
| Hypothetical protein                                                          |        | AL832686 / DKFZp313C0434 | cytoskeleton - actin                     | cytoskeleton                               |
| Leiomodin 3, LMOD3                                                            | Q5JPG6 | AL832033 / DKFZp451P024  | cytoskeleton - actin + cytoplasm         | cytoskeleton - microtubules + cytoplasm    |
| Hypothetical protein                                                          |        | AL833438 / DKFZp313E0842 | cytoskeleton - actin                     | cytoskeleton                               |
| Hypothetical protein                                                          |        | AL832031 / DKFZp451O084  | cytoskeleton - actin                     | cytoskeleton + aggregates                  |
| Myopalladin, MYPN                                                             | Q86T37 | AL832379 / DKFZp451K027  | cytoskeleton - actin                     | aggregates                                 |
| Spermatogenesis associated protein 7, Spermatogenesis associated protein HSD3 | Q9P0W8 | AL136604 / DKFZp564F2122 | cytoskeleton - microtubules              | cytoskeleton - microtubules                |
| G2/mitotic-specific cyclin B2                                                 | O95067 | AL080146 / DKFZp434B174  | cytoskeleton - microtubules + aggregates | cytoskeleton + cytoplasm                   |
| Hypothetical protein                                                          | Q9BQI0 | AL833896 / DKFZp761N011  | cytoskeleton - actin                     | cytoskeleton + cytoplasm                   |
| Synaptopodin                                                                  | Q8N3V7 | AL831818 / DKFZp451G172  | cytoskeleton - actin                     | cytoskeleton                               |
| Microtubule-associated protein, RP/EB family, member 3                        | Q9UPY8 |                          | not tested                               | cytoskeleton - microtubules                |
| Microtubule-associated protein, RP/EB family, member 2                        | Q15555 | BC007318 / IMAGE:2989643 | cytoskeleton - microtubules              | cytoskeleton - microtubules + cytoplasm    |
| Hypothetical protein                                                          | Q9BQI0 | AL833896 / DKFZp761N011  | cytoskeleton - actin                     | cytoskeleton + Golgi + cytoplasm           |



|                                                                  |        |                          |                                |                                       |
|------------------------------------------------------------------|--------|--------------------------|--------------------------------|---------------------------------------|
| Sorbin and SH3 domain-containing protein 1, SH3P12               | Q9UFT2 | AL117472 / DKFZp586P1422 | cytoskeleton - focal adhesions | cytoskeleton + neurite tips           |
| Hypothetical protein                                             | Q9Y4P9 | AL080154 / DKFZp434I114  | cytoskeleton - microtubules    | cytoskeleton - microtubules + nucleus |
| Hypothetical protein                                             | Q9H0Q7 | AL136694 / DKFZp564J047  | cytoskeleton - microtubules    | cytoskeleton - microtubules           |
| CRIB-containing BORG2 protein                                    | Q9UKI2 | AL136842 / DKFZp434A0530 | cytoskeleton - actin           | cytoskeleton + cytoplasm              |
| Kinesin family member 2C, KIF2C                                  | Q99661 | BC014924 / IMAGE:3909438 | cytoskeleton - microtubules    | cytoplasm                             |
| Synaptopodin-2, SYP-2                                            | Q9UMS6 | AL833547 / DKFZp686M023  | cytoskeleton - actin           | cytoskeleton - microtubules           |
| Kinesin-associated protein 3, KAP3                               | Q5VXW0 |                          | not tested                     | cytoplasm                             |
| Tubulin alpha 2 , TUBA2 (control)                                | Q13748 |                          | not tested                     | cytoskeleton - microtubules           |
| actin beta, ACTB (control)                                       | P60709 |                          | not tested                     | cytoskeleton - actin                  |
| Microtubule-associated protein, RP/EB family, member 1 (control) | Q15691 |                          | not tested                     | cytoskeleton - microtubules           |
| Cell division cycle 42, CDC42 (control)                          | P60953 |                          | not tested                     | cytoplasm                             |
| Transforming protein RhoA (control)                              | P61586 |                          | not tested                     | cytoplasm                             |

**Supplementary Table 2.** Controls used in the establishment of the screen

| Negative controls                                  |                               |                                                                                                 |                                                                                                                                                        |
|----------------------------------------------------|-------------------------------|-------------------------------------------------------------------------------------------------|--------------------------------------------------------------------------------------------------------------------------------------------------------|
| Protein name<br>(SwissPROT ID)                     | Localization in<br>PC12 cells | Function/citation describing<br>how overexpression effects<br>neurite outgrowth                 | Overexpression<br>effect on neurite<br>outgrowth                                                                                                       |
| GFP                                                | cytoplasm                     | /                                                                                               | no effect                                                                                                                                              |
| Tubulin alpha<br>(Q13748)                          | microtubules                  | cytoskeletal component                                                                          | no effect                                                                                                                                              |
| Actin beta<br>(P60709)                             | actin                         | cytoskeletal component                                                                          | no effect                                                                                                                                              |
| RB/EB family member 1<br>(Q15691)                  | microtubules                  | cytoskeletal component                                                                          | no effect                                                                                                                                              |
| Sar1<br>(Q9NR31)                                   | Golgi, cytoplasm              | membrane traffic                                                                                | no effect                                                                                                                                              |
| Rab6<br>(Q9H0N0)                                   | Golgi                         | membrane traffic                                                                                | no effect                                                                                                                                              |
| Rab33<br>(Q9H082)                                  | Golgi                         | membrane traffic                                                                                | no effect                                                                                                                                              |
| Rab1<br>(Q9H0U4)                                   | Golgi                         | membrane traffic                                                                                | no effect                                                                                                                                              |
| Coatomer beta subunit<br>(P53618)                  | Golgi                         | membrane traffic                                                                                | no effect                                                                                                                                              |
| Synaptotagmin-3<br>(Q9BQG1)                        | Golgi, neurite tips           | synaptic exocytosis/ (Nonet et al.,<br>1993)                                                    | no effect                                                                                                                                              |
| Synaptoporin<br>(Q8TBG9)                           | Golgi, neurite tips           | synaptic vesicles maturation/ (Dai et<br>al., 2003)                                             | no effect                                                                                                                                              |
| Annexin A4<br>(P09525)                             | cytoplasm, plasma<br>membrane | synaptic exocytosis/ (Willshaw et al.,<br>2004)                                                 | no effect                                                                                                                                              |
| Positive controls                                  |                               |                                                                                                 |                                                                                                                                                        |
| SNAP-25<br>(P60880)                                | Golgi, plasma<br>membrane     | vesicle fusion/ (Shirasu et al., 2000)                                                          | increases the number of<br>neurites per cell (from 2 to<br>2.7 neurites per cell on<br>average)                                                        |
| Cdc42<br>(P60953)                                  | Golgi, plasma<br>membrane     | actin cytoskeleton remodelling/ (da<br>Silva and Dotti, 2002)                                   | induces sprouting of<br>numerous filopodia-like<br>structures, constitutively<br>active form of Cdc42<br>increases the number of<br>neurites per cell. |
| small chemical Y-27632<br>(ROCK inhibitor)         | /                             | actin cytoskeleton remodelling/ (da<br>Silva and Dotti, 2002; Hirose et al.,<br>1998)           | increases the number of<br>neurites per cell (from 2 to<br>2.7 neurites per cell on<br>average)                                                        |
| VAMP2<br>(Q9BUC2)                                  | Golgi, neurite tips           | vesicle fusion/ (Shirasu et al., 2000)                                                          | increases the neurite length<br>by 30%                                                                                                                 |
| CaMK-II beta<br>(Q13554)                           | plasma membrane,<br>cytoplasm | prominent kinase involved in the<br>many aspects of neurite outgrowth/<br>(Nomura et al., 1997) | increases the neurite length<br>by 25%                                                                                                                 |
| RhoA<br>(P61586)                                   | cytoplasm, plasma<br>membrane | actin cytoskeleton remodelling/<br>(Nusser et al., 2002)                                        | blocks neurite outgrowth<br>in 81% of the cells                                                                                                        |
| GTP restricted dominant<br>negative mutant of Sar1 | Golgi                         | blocks ER to golgi transport                                                                    | blocks neurite outgrowth<br>in 65% of the cells                                                                                                        |

**Supplementary Table 3.** Changes in gene expression 24 hours after NGF treatment measured by real-time quantitative RT-PCR

| Protein Name                                                          | SwissPROT ID | primer pair used                                            | fold change +/- S.D. |
|-----------------------------------------------------------------------|--------------|-------------------------------------------------------------|----------------------|
| Proteins whose overexpression affects the number of neurites per cell |              |                                                             |                      |
| Coiled-coil domain containing 8, CCDC8                                | Q9H0W5       | 5' gttggggaaccaactt 3'<br>5' cagtgtcgcctccctgtaat 3'        | 3.59 +/- 0.54        |
| Frizzled homologue 7, FZD7                                            | Q96B74       | 5' cgccttcactcgcgatg 3'<br>5' gcaagagaagggaagacc 3'         | 1.31 +/- 0.21        |
| Hypothetical protein, new isoform of m2 receptor                      | Q4VBK6       | 5' gcatacccaatacagatggac 3'<br>5' cggattgatggtctattga 3'    | 1.19 +/- 0.14        |
| Hypothetical protein                                                  | Q69YW2       | 5' cacaaagacgccgagacc 3'<br>5' ctctcgcgaacctgcac 3'         | 0.99 +/- 0.01        |
| RP/EB family member 3                                                 | Q9UPY8       | 5'aaaggattacaacctctgctg 3'<br>5'ggagctctctgtggaactg 3'      | 2.7 +/- 0.96         |
| Proteins whose overexpression affects neurite length                  |              |                                                             |                      |
| Gamma-BAR                                                             | Q9H0V0       | 5' gaatgacgacgacacctct 3'<br>5' ggcagcatcctattcattcc 3'     | 1.65 +/- 0.13        |
| SACMIL                                                                | Q9NTJ5       | 5' agtttattagctcggcgttc 3'<br>5' tccacatgcaaaactccta 3'     | 1.61 +/- 0.05        |
| Proteins whose overexpression blocked neurite outgrowth               |              |                                                             |                      |
| Transmembrane 4 superfamily member 10                                 | Q9BQJ4       | 5' gttgctgcatgctttttgc 3'<br>5' tttcaagctcacagttcaataaa 3'  | 2.04 +/- 0.16        |
| Hypothetical protein, zinc and ring finger 1                          | Q9H083       | 5' tggaggagctgcttcagg 3'<br>5' tcactcaaacatgagctatgc 3'     | 1.4 +/- 0.34         |
| Hypothetical protein                                                  | Q9BQI0       | 5' tctaccgagactttggaacat 3'<br>5' ttcttcaaacatcatgaccag 3'  | 0.58 +/- 0.02        |
| Hypothetical protein                                                  | Q9Y4P9       | 5' acctctcccggatttca 3'<br>5' gggacataattgtgcatctcc 3'      | 1.33 +/- 0.14        |
| CRIB-containing BORG2 protein                                         | Q9UKI2       | 5' gaatcccttccgacctgac 3'<br>5'aaaagtgaggccccaga 3'         | 0.69 +/- 0.05        |
| Kinesin family member 2C, KIF2C                                       | Q99661       | 5' gccatttcccattcacaca 3'<br>5' catcaacaacgtaattctgca 3'    | 0.26 +/- 0.1         |
| RP/EB family member 2                                                 | Q15555       | 5' tcttacagttggggaatggc 3'<br>5'accatgcaatgatgcatg 3'       | 0.53 +/- 0.18        |
| Proteins used as controls and others                                  |              |                                                             |                      |
| Adenomatous polyposis coli protein (APC protein)                      | P25054       | 5' aaggcatggaccaggaca 3'<br>5' cagggcagatctgatgctc 3'       | 2.79 +/- 0.36        |
| Glycogen synthase-kinase 3 beta (Gsk3 beta)                           | P49481       | 5' cacatcctggacgaagtc 3'<br>5' aggagacggctacacagtgc 3'      | 1.38 +/- 0.36        |
| Cell division cycle 42, Cdc42                                         | P60953       | 5'ggctgtcaagtatgtggagtgt 3'<br>5' ggctcttctcggttctgg 3'     | 1.14 +/- 0.09        |
| Ras-related protein RAB5A                                             | P20339       | 5'gctaagacatcaatgaatgtaataaa 3'<br>5' tgtcaggctcagtaagtc 3' | 2.32 +/- 0.45        |
| RP/EB family member 1                                                 | Q15691       | 5' atgacgaagctgctgaattg 3'<br>5' ctctcttccaagtctcaacag 3'   | 1.17 +/- 0.2         |
| Kinesin-like protein Kif3C                                            | O14782       | 5' gaagatcctggagatctgaa 3'<br>5' cccaatgagtagcttctct 3'     | 2.04 +/- 0.03        |
| neurofilament triplet M protein (NF-M) (positive control)             | P07197       | 5' cgtcatttgcgagaatacca 3'<br>5' tcttaccctccagtagttcc 3'    | 4.65 +/- 0.05        |

### Supplementary references:

da Silva, J. S., and Dotti, C. G. (2002). Breaking the neuronal sphere: regulation of the actin cytoskeleton in neuritogenesis. *Nat Rev Neurosci* 3, 694-704.

Dai, J., Ji, C., Gu, S., Wu, Q., Wang, L., Xu, J., Zeng, L., Ye, X., Yin, G., Xie, Y., and Mao, Y. (2003). Cloning and sequence analysis of the human cDNA encoding the synaptoporin (delta), a highly conservative synaptic vesicle protein. *Mol Biol Rep* 30, 185-191.

Hirose, M., Ishizaki, T., Watanabe, N., Uehata, M., Kranenburg, O., Moolenaar, W. H., Matsumura, F., Maekawa, M., Bito, H., and Narumiya, S. (1998). Molecular dissection of the Rho-associated protein kinase (p160ROCK)-regulated neurite remodeling in neuroblastoma N1E-115 cells. *J Cell Biol* 141, 1625-1636.

Nomura, T., Kumatoriya, K., Yoshimura, Y., and Yamauchi, T. (1997). Overexpression of alpha and beta isoforms of Ca<sup>2+</sup>/calmodulin-dependent protein kinase II in neuroblastoma cells -- H-7 promotes neurite outgrowth. *Brain Res* 766, 129-141.

Nonet, M. L., Grundahl, K., Meyer, B. J., and Rand, J. B. (1993). Synaptic function is impaired but not eliminated in *C. elegans* mutants lacking synaptotagmin. *Cell* 73, 1291-1305.

Nusser, N., Gosmanova, E., Zheng, Y., and Tigy, G. (2002). Nerve growth factor signals through TrkA, phosphatidylinositol 3-kinase, and Rac1 to inactivate RhoA during the initiation of neuronal differentiation of PC12 cells. *J Biol Chem* 277, 35840-35846.

Shirasu, M., Kimura, K., Kataoka, M., Takahashi, M., Okajima, S., Kawaguchi, S., Hirasawa, Y., Ide, C., and Mizoguchi, A. (2000). VAMP-2 promotes neurite elongation and SNAP-25A increases neurite sprouting in PC12 cells. *Neurosci Res* 37, 265-275.

Willshaw, A., Grant, K., Yan, J., Rockliffe, N., Ambavarapu, S., Burdyga, G., Varro, A., Fukuoka, S., and Gawler, D. (2004). Identification of a novel protein complex containing annexin A4, rabphilin and synaptotagmin. *FEBS Lett* 559, 13-21.
